# Supplementary material for: Synthesis and Application in Anticounterfeiting of RGB Upconversion Nanoparticles
Source: Hindawi journal article supplement (doi:10.1155/2019/3872591), 2019-12-20
Supplement: f1 [file 3872591.f1.pdf]

# Synthesis and Application in Anti-counterfeiting of RGB

## Up-conversion Nanoparticles

Yongling Zhang\*, Peng Lv, Zhengkun Qin\*

### Supporting information

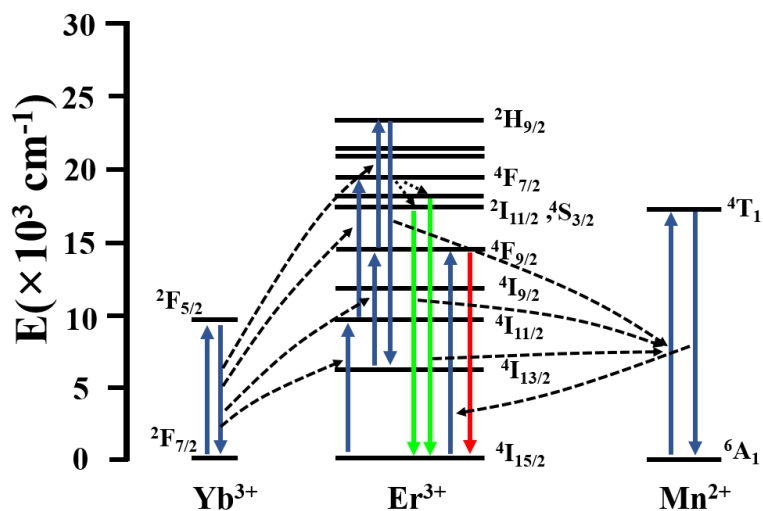

**Figure S1:** The energy-level diagram of  $\text{KMnF}_3:\text{Yb}^{3+},\text{Er}^{3+}$  NPs excited with 980 nm laser.

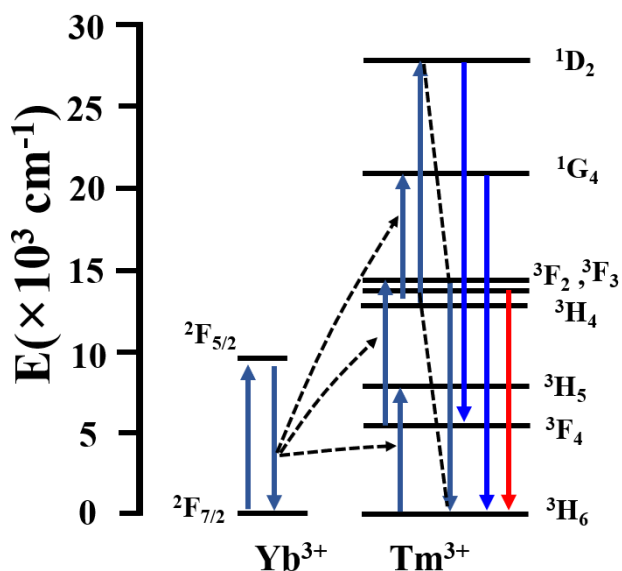

**Figure S2:** The energy-level diagram of  $\text{NaYF}_4:\text{Yb}^{3+},\text{Tm}^{3+}$  NPs excited with 980 nm laser.

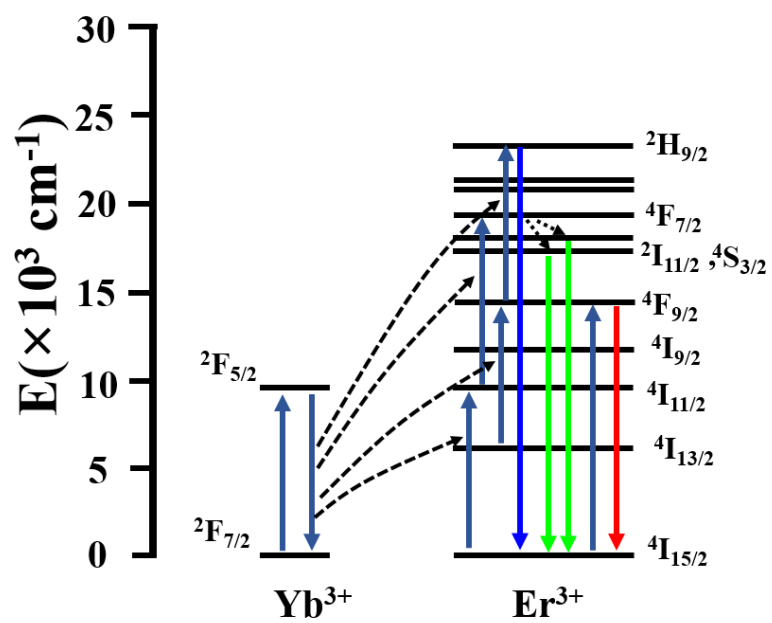

**Figure S3:** The energy-level diagram of NaYF<sub>4</sub>:Yb<sup>3+</sup>, Er<sup>3+</sup> NPs excited with 980 nm laser.
